# Supplementary material for: Mining for hemicellulases in the fungus-growing termite Pseudacanthotermes militaris using functional metagenomics
Source: PubMed Central journal article supplement (PMC3662619; doi:10.1186/1754-6834-6-78), 2013-05-14
Supplement: 1754-6834-6-78-S1.pdf [file 1754-6834-6-78-S1.pdf]

## Additional files

**Table S1.** Phenotypic and genotypic characteristics of all fosmid clones analyzed in this study.

| Fosmid | Phenotype | Library | Contig ID     | Contig size (bp) | Accession number | CAZY annotations                          | Taxonomic assignment |
|--------|-----------|---------|---------------|------------------|------------------|-------------------------------------------|----------------------|
| A3     | Xyl (++)  | A       | R1.RL1.C165   | 4195             | HF548269         |                                           |                      |
|        |           |         | R1.RL1.C493   | 37683            | HF548270         | GH1;GH43;CE4                              | Clostridiales        |
| A9     | Xyl (++)  | A       | R3.RL2.C1004a | 1905             | HF548295         |                                           |                      |
|        |           |         | R3.RL2.C1004b | 19833            | HF548296         | GH3                                       | Enterobacteriaceæ    |
| B9     | Xyl (++)  | A       | R1.RL3.C200   | 26239            | HF548271         | GH3                                       | Firmicutes           |
| G7     | Abf (++)  | A       | R1.RL6.C332   | 19495            | HF548277         | GH51                                      | Bacteroides          |
|        |           |         | R1.RL6.C64    | 17173            | HF548276         |                                           |                      |
| G12    | Abf (++)  | A       | R1.RL7.C388   | 41175            | HF548278         | GH51; GH97; GH43; GH43;<br>GH51-GH43-CBM4 | Bacteroides          |
| H8     | Abf (++)  | C       | R1.RL8.C1646  | 35932            | HF548279         | GT84-GH94;GH51; GH51                      | Clostridiales        |

|    |              |   |             |       |          |                          |               |
|----|--------------|---|-------------|-------|----------|--------------------------|---------------|
| D2 | Xyl/Abf (++) | A | R1.RL4.C131 | 7226  | HF548272 |                          |               |
|    |              |   | R1.RL4.C261 | 15503 | HF548273 | GH3                      | Firmicutes    |
|    |              |   | R1.RL4.C295 | 11933 | HF548274 | GH3                      |               |
| F3 | Xyl/Abf (++) | A | R1.RL5.C53  | 39140 | HF548275 | GH43                     | Clostridiales |
| D3 | Xyl/Abf (++) | A | R4.RL5.C362 | 34435 | HF548324 | GH99;GH97;CE1;GH3        | Bacteroidales |
| A4 | Xyl/Abf      | A | R3.RL1.C178 | 5010  | HF548293 | CE1                      |               |
|    |              |   | R3.RL1.C247 | 2375  | HF548294 |                          |               |
|    |              |   | R3.RL1.C25  | 969   | HF548292 |                          |               |
|    | Xyl/Abf      | A | R3.RL3.C478 | 1234  | HF548297 |                          |               |
|    |              |   | R3.RL3.C591 | 21831 | HF548298 | GH36;CBM32;CBM32;CE1;GH3 | Bacteroidales |
|    |              |   | R3.RL3.C600 | 13454 | HF548299 | CE1;GH88                 | Bacteroidales |
|    | Xyl/Abf      | A | R3.RL4.C723 | 26241 | HF548300 | GH3                      | Firmicutes    |
|    | Xyl/Abf      | A | R3.RL5.C749 | 1152  | HF548303 |                          |               |
|    |              |   | R3.RL5.C501 | 32348 | HF548301 | GH99;GH97;CE1;GH3        |               |
|    |              |   | R3.RL5.C510 | 14503 | HF548302 | CE1                      | Bacteroidales |

|     |         |   |              |       |          |                   |                   |
|-----|---------|---|--------------|-------|----------|-------------------|-------------------|
|     | Xyl/Abf | A | R3.RL6.C1030 | 13363 | HF548305 |                   |                   |
|     |         |   | R3.RL6.C898  | 16503 | HF548304 | GH3               | Enterobacteriaceæ |
|     | Xyl/Abf | A | R3.RL7.C34   | 38744 | HF548306 | GT2;GH3;GH3       | Clostridiales     |
|     | Xyl/Abf | A | R3.RL9.C29   | 36950 | HF548308 | GH51              | Actinomycetales   |
| A10 | Xyl/Abf | A | R4.RL1.C20   | 34201 | HF548313 | GH99;GH97;CE1;GH3 | Allistipes        |
|     |         |   | R4.RL1.C29   | 7076  | HF548314 | CE1               |                   |
|     | Xyl/Abf | A | R4.RL2.C314  | 1810  | HF548315 |                   |                   |
|     |         |   | R4.RL2.C571a | 628   | HF548316 |                   |                   |
|     |         |   | R4.RL2.C571b | 3654  | HF548317 | CE1               |                   |
|     |         |   | R4.RL2.C581  | 21756 | HF548318 | GH3;CE1;GH97;GH99 | Bacteroidales     |
|     |         |   | R4.RL2.C951  | 1070  | HF548319 |                   |                   |
|     | Xyl/Abf | A | R4.RL3.C244a | 193   | HF548320 |                   |                   |
|     |         |   | R4.RL3.C244b | 14312 | HF548321 | GH99;GH97;CE1;GH3 | Bacteroidetes     |
|     |         |   | R4.RL3.C254  | 10133 | HF548322 | CE1               |                   |

|         |   |              |       |          |                          |                                     |
|---------|---|--------------|-------|----------|--------------------------|-------------------------------------|
| Xyl/Abf | A | R4.RL4.C328  | 46075 | HF548323 | GH3;GH116;GH78           | Firmicutes                          |
| Xyl/Abf | A | R4.RL7.C13   | 36172 | HF548326 | GH97;GH51                | Bacteroidales                       |
| Xyl/Abf | C | R3.RL8.C128  | 38738 | HF548307 | GH1;GH3                  | Enterobacteriaceæ<br>(Rhanella sp.) |
| Xyl/Abf | C | R4.RL6.C373  | 35626 | HF548325 | GT4;GH51                 | Burkholderia                        |
| Xyl/Abf | C | R3.RL11.C585 | 25971 | HF548310 | CE1;CE1;GH5;GH51         | Actinobacteriaceae                  |
|         |   | R3.RL11.C823 | 3657  | HF548311 |                          |                                     |
| Abf     | A | R2.RL11.C140 | 25721 | HF548289 | CE1;GH109;GH51;GH97      | Bacteroidales                       |
|         |   | R2.RL11.C402 | 143   | HF548290 |                          |                                     |
| Abf     | C | R2.RL12.C211 | 37005 | HF548291 | GH51<br>GH13CBM28GH13TM  | Actinomycetales                     |
| Abf     | A | R3.RL12.C311 | 34399 | HF548312 | GH51;GH4                 | Rhizobiales                         |
| Abf (+) | A | R3.RL10.C874 | 24375 | HF548309 | GH51-43;GH43             | Bacteroides                         |
| Xyn     | A | R2.RL1.C657  | 33928 | HF548280 | GH115;GH10;CE1;GH11;GH43 | Bacteroidales                       |
| Xyn     | A | R2.RL2.C328  | 36210 | HF548281 | GH13;GH115;GH10          | Bacteroidales                       |

|      |     |   |              |       |          |                                             |                   |
|------|-----|---|--------------|-------|----------|---------------------------------------------|-------------------|
| Xyn3 | Xyn | A | R2.RL3.C397  | 37589 | HF548282 | GH115;GH10;CE1;GH11;GH43;GH<br>10-CBM4-GH10 | Bacteroidales     |
|      | Xyn | A | R2.RL4.C483  | 40188 | HF548283 | GH10;CE1;GH11;GH43                          | Bacteroidales     |
|      | Xyn | A | R2.RL5.C375  | 38198 | HF548284 | GH115;GH10;CE1;GH11;GH43;GH<br>10-CBM4-GH10 | Bacteroidales     |
|      | Xyn | A | R2.RL6.C472  | 36826 | HF548285 | GH115;GH10;CE1;GH11;GH43                    | Bacteroidales     |
|      | Xyn | A | R2.RL7.C37   | 33012 | HF548286 | GH115;GH10;CE1;GH11;GH43;GH<br>10-CBM4-GH10 | Bacteroidetes     |
|      | Xyn | A | R2.RL9.C142  | 39455 | HF548287 | GH115;GH10;CE1;GH11;GH43;GH<br>10-CBM4-GH10 | Bacteroidales     |
|      | Xyn | A | R2.RL10.C173 | 36811 | HF548288 | GH115;GH10;CE1;GH11;GH43;GH<br>10-CBM4-GH10 | Bacteroides       |
|      | Glu | C | R4.RL8.C313  | 13140 | HF548327 |                                             |                   |
|      |     |   | R4.RL8.C363  | 24581 | HF548328 | GH8;GT2                                     | Enterobacteriaceæ |
|      | Glu | C | R4.RL9.C551  | 40982 | HF548329 | SIGN-GH8                                    |                   |

|     |   |               |       |          |                 |                   |
|-----|---|---------------|-------|----------|-----------------|-------------------|
| Glu | C | R4.RL10.C198  | 39740 | HF548330 | GH8;GT2;GH8;GT2 | Enterobacteriaceæ |
| Glu | C | R4.RL11.C254  | 34909 | HF548331 | GT2;GT2;GH8     | Enterobacteriaceæ |
| Glu | C | R4.RL12.C126  | 14575 | HF548333 | GT2;GH8         | Bacteroidales     |
|     |   | R4.RL12.C51   | 3285  | HF548332 |                 |                   |
|     |   | R4_RL12_C251  | 8672  | HF548334 |                 |                   |
|     |   | R4_RL12_C373a | 236   | HF548335 |                 |                   |
|     |   | R4_RL12_C373b | 4322  | HF548336 |                 |                   |

Library abbreviations are A, abdomen and C, comb. Activities expressed by fosmids were classed as either weak, medium (+) or strong (++) . Enzyme abbreviations are Abf,  $\alpha$ -L-arabinofuranosidase; Xyl,  $\beta$ -D-xylosidase; Xyn, endo- $\beta$ -D-xylanase; Glu, endo- $\beta$ -D-1,3/1,4-glucanase

**Table S2.** Primers used for the subcloning of selected glycoside hydrolases identified in this study.

| Primer name          | Sequence (5'→3')                                | Restriction site |
|----------------------|-------------------------------------------------|------------------|
| G12-GH51X103_ORF2_F  | GGGGGGGCTAGCAAGGGCGTGACCATCACCATTC              | NheI             |
| G12-GH51X103_ORF2_R  | CCCCCCTCGAGCTATTGTAAGTCTATGGTAACTATC<br>GATTTG  | XhoI             |
| G12-X10-GH51-GH43_F  | GGGGGGGCTAGCGCGCAAACCAACGAACTGGTG               | NheI             |
| G12-X10-GH51-GH43_R  | CCCCCCTCGAGCTATATCCCCTCGGAGGTCATC               | XhoI             |
| G12-UNK-GH43-UNK-a_F | GGGGGGGCTAGCAGCCCGGAAGGCGATGATCC                | NheI             |
| G12-UNK-GH43-UNK-a_R | CCCCCCTCGAGCTATTTTTCTTTTTTCCCCCAATAT<br>GTTTTGC | XhoI             |
| G12-UNK-GH43-UNK-b_F | GGGGGGGCTAGCGTGAGTTGTAATTCATTTACACCC<br>GTC     | NheI             |
| G12-UNK-GH43-UNK-b_R | CCCCCCTCGAGTTATTTTACCCTCTTTCCCCACACG<br>G       | XhoI             |
| A3-GH43-X19_F        | GGGGGGGCTAGCATGATCAAAAATCCCGTATTGTCA<br>GG      | NheI             |
| A3-GH43-X19_R        | CCCCCCTCGAGTTAACGCGGGATATATTCAAAGCC             | XhoI             |
| F3-GH43-UNK_F        | GGGGGGGCTAGCATGAAGCAAATCACCAACCCCTAC<br>C       | NheI             |
| F3-GH43-UNK_R        | CCCCCCTCGAGTTACGCCGTCACAAAGGCGAAATC             | XhoI             |

**Figure S1: Principal Component Analyses (PCA) of the activities expressed by selected clones.**

Analysis was performed using Minitab (version 16) software.

**Figure S2. Alignment and assembly of contigs from xylanase and arabinofuranosidase-positive clones.**

Contigs generated from A. nine xylanase-positive fosmid clones, and B. five arabinofuranosidase- and xylosidase-positive fosmid clones. Black lines represent contig sequences; blue lines represent the result of the alignment and assembly; green arrows symbolize putative CDS encoding carbohydrate-active enzymes; purple arrows and boxes represent putative insertion elements and parts of a transposase sequence, respectively.



Figure S1.



**Figure S2**

**A.**

Name of contig (length bp)

- RL10\_C173 (36811)
- RL9\_C142 (39455)
- RL7\_C37 (33012)
- RL3\_C397 (35789)
- RL1\_C657 (33928)
- RL2\_C328 (36120)
- RL5\_C375 (38198)
- RL6\_C472 (36826)
- RL4\_C483 (40188)



**B.**

- R3\_RL3\_C501 (32348)
- R4\_RL1\_C20 (34201)
- R4\_RL2\_C581 (21756)
- R4\_RL3\_C244b (14312)
- R4\_RL5\_C362 (34435)

Assembled fragment (34441)
